# Supplementary material for: How far away are iron carbide clusters from the bulk?
Source: Royal Society of Chemistry journal article supplement (doi:10.1039/c6cp06224e), 2016-01-01
Supplement: c6cp06224e1.pdf [file c6cp06224e1.pdf]

## Supporting Information

### How far away are the iron carbide clusters from the bulks?

Longyan Zheng,<sup>a,b,c</sup> Xingcheng Liu,<sup>a</sup> Yu Meng,<sup>a,b,c</sup> Yuwei Zhou,<sup>a,b</sup> Wenping Guo,<sup>b</sup> Qing Peng,<sup>d</sup>

Yong Yang,<sup>a,b</sup> Haijun Jiao,<sup>a,e</sup> Yong-Wang Li,<sup>a,b</sup> & Xiao-Dong Wen,<sup>a,b\*</sup>

*a. State Key Laboratory of Coal Conversion, Institute of Coal Chemistry, Chinese Academy of Sciences, Taiyuan, 030001, P.R. China.*

*b. National Energy Center for Coal to Clean Fuels, Synfuels China Co., Ltd, Huairou District, Beijing, 101400, P.R. China.*

*c. University of Chinese Academy of Sciences, No.19A Yuquan Road, Beijing, 100049, P.R. China.*

*d. Department of Mechanical, Aerospace and Nuclear Engineering, Rensselaer Polytechnic Institute, Troy, NY 12180, USA.*

*e. Leibniz-Institut für Katalyse e.V. an der Universität Rostock, Albert-Einstein Strasse 29a, 18059 Rostock, Germany.*

**Table S1. The calculation methods used in the last 2 decades for neutral iron carbide clusters.**

| Author-Year                  | Methods/bases                                                                                                                        | Code packages              | Research objects                                                                                           |
|------------------------------|--------------------------------------------------------------------------------------------------------------------------------------|----------------------------|------------------------------------------------------------------------------------------------------------|
| Cao-1996 <sup>1</sup>        | HF/MIDI* and CISD+Q                                                                                                                  | GAMESS 90                  | FeC <sub>2</sub>                                                                                           |
| Nash-1996 <sup>2</sup>       | HF-MP4, LDA, nonlocal/<br>(9s5p1d/3s2p1d) for C,<br>(13s8p5d/5s3p3d) for Fe                                                          | Gaussian 94                | FeC, FeC <sub>2</sub> , FeC <sub>3</sub>                                                                   |
| Sosa-1997 <sup>3</sup>       | LDA BP/STO-IV                                                                                                                        | ADF 2.0.1                  | FeC, Fe <sub>5</sub> C                                                                                     |
| Arbuznikov-1999 <sup>4</sup> | B3LYP/DZP for C,<br>(14s11p6d3f)/[8s6p4d1f] for Fe;<br>CASSCF, CASPT2/<br>(10s6p3d)/[4s3p2d] for C<br>(17s12p9d4f)/[7s5p4d3f] for Fe | Gaussian 98<br>MOLCAS 4.1  | FeC <sub>2</sub>                                                                                           |
| Tzeli-2002 <sup>5</sup>      | MRCI/7s6p4d3f for Fe,<br>cc-pVTZ for C;<br>MRCI/7s6p4d3f2g for Fe,<br>cc-pVQZ for C                                                  | MOLPRO 2000                | FeC                                                                                                        |
| Gutsev-2003 <sup>6</sup>     | BPW91/6-311+G(d)                                                                                                                     | Gaussian 98                | Fe <sub>x</sub> C (x = 1~6)                                                                                |
| Noya-2003 <sup>7</sup>       | PBE/split-valence triple- $\zeta$ bases<br>with double- $\zeta$ polarization                                                         | SIESTA                     | FeC                                                                                                        |
| Hendrickx-2004 <sup>8</sup>  | CASSCF/ANO-S<br>CASPT2/ANO-L<br>B3LYP/6-31G**                                                                                        | MOLCAS 5.4<br>Gaussian 98  | FeC <sub>2</sub> , FeC <sub>3</sub>                                                                        |
| Ryzhkov-2005 <sup>9</sup>    | P91m/DND                                                                                                                             | DMol3                      | FeC <sub>2</sub> , Fe <sub>2</sub> C, FeC <sub>3</sub> , Fe <sub>3</sub> C, Fe <sub>2</sub> C <sub>2</sub> |
| Rayon-2006 <sup>10</sup>     | B3LYP, QCISD/6-311+G(3df)<br>QCISD/6-311+G(d)<br>CASSCF/6-311+G(d)<br>BP86/TZ2P+                                                     | MOLPRO<br>2002.1<br>MORPHY | FeC <sub>2</sub>                                                                                           |
| Yuan-2006 <sup>11</sup>      | B3LYP/LANL2DZ                                                                                                                        | Gaussian 03                | FeC <sub>2</sub>                                                                                           |
| Harris-2007 <sup>12</sup>    | BLYP/DND                                                                                                                             | DMol v2.36 and<br>v960     | Fe <sub>x</sub> C <sub>12</sub> (x = 2, 3, 4, 6, 8, 10,<br>12)                                             |
| Ma-2007 <sup>13</sup>        | BLYP/DNP                                                                                                                             | DMol                       | FeC <sub>y</sub> (y = 1~8), Fe <sub>2</sub> C <sub>y</sub> (y =<br>1~6)                                    |
| Ryzhkov-2007 <sup>14</sup>   | PBE/DND                                                                                                                              | DMol3                      | Fe <sub>2</sub> C <sub>3</sub>                                                                             |
| Sun-2008 <sup>15</sup>       | PW91/DND                                                                                                                             | DMol3                      | Fe <sub>3</sub> C <sub>2</sub>                                                                             |

|                                                     |                                                 |                      |                                                                                                                                           |
|-----------------------------------------------------|-------------------------------------------------|----------------------|-------------------------------------------------------------------------------------------------------------------------------------------|
| Zhang-2008 <sup>16</sup>                            | PBE/plane-wave and ultra-soft pseudo potentials | Quantum-ESPRESSO     | Fe <sub>x</sub> C (x = 1~6)                                                                                                               |
| Largo-2009 <sup>17</sup>                            | B3LYP/6-311+G(d)                                | Gaussian             | FeC <sub>y</sub> (y = 1~8)                                                                                                                |
| Zhu-2009 <sup>18</sup>                              | B3LYP/6-311+G(d)                                | Gaussian 03          | FeC <sub>y</sub> (y = 1~10)                                                                                                               |
| Ryzhkov-2012 <sup>19</sup>                          | PBE, BLYP/DND                                   | DMol3                | Fe <sub>3</sub> C <sub>5</sub> , Fe <sub>x</sub> C <sub>y</sub> (x = 1~3; y = 1~4)<br>Fe <sub>x+1</sub> C <sub>y</sub> (x = 3~6)(y = x~8) |
| Gutsev-2012 <sup>20</sup>                           | BPW91/6-311+G(d)                                | Gaussian 03, 09      | Fe <sub>13</sub> C <sub>y</sub> (y = 1~20)                                                                                                |
| Chang-2013 <sup>21</sup>                            | B3LYP/6-31G(d)                                  | Gaussians 03         | FeC <sub>2</sub> , FeC <sub>3</sub>                                                                                                       |
| Ganji-2013 <sup>22</sup>                            | PBE /DZP                                        | SIESTA<br>TRANSIESTA | Fe <sub>8</sub> C <sub>12</sub>                                                                                                           |
| Li-2013 <sup>23</sup><br>Fishtik-2013 <sup>24</sup> | M11-L, SOGGA11,<br>M06-L etc./                  | Gaussian 09          | FeC                                                                                                                                       |
| Chen-2014 <sup>25</sup>                             | BLYP/DNP                                        | DMol3                | FeC <sub>y</sub> (y = 9~15)                                                                                                               |

**Table S2. The coordinates of predicted clusters (E for elements).**

| Formula | The coordinates of clusters |       |       |       |    |       |       |       |    |       |       |       |
|---------|-----------------------------|-------|-------|-------|----|-------|-------|-------|----|-------|-------|-------|
|         | E                           | X (Å) | Y (Å) | Z (Å) | E  | X (Å) | Y (Å) | Z (Å) | E  | X (Å) | Y (Å) | Z (Å) |
| Fe1C1   | C                           | 10.39 | 10.3  | 10.75 | Fe | 10.39 | 10.3  | 9.19  |    |       |       |       |
| Fe1C2   | C                           | 9.4   | 9.52  | 9.58  | C  | 9.44  | 10.6  | 10.3  | Fe | 11.16 | 9.87  | 10.12 |
| Fe1C3   | C                           | 10.06 | 10.17 | 8.78  | C  | 10.08 | 10.76 | 10    | C  | 9.98  | 10.18 | 11.22 |
|         | Fe                          | 9.88  | 8.89  | 10    |    |       |       |       |    |       |       |       |
| Fe1C4   | C                           | 10.02 | 9.99  | 8.3   | C  | 10.04 | 9.72  | 11.68 | C  | 9.88  | 10.73 | 9.37  |
|         | C                           | 9.89  | 10.62 | 10.74 | Fe | 10.18 | 8.93  | 9.91  |    |       |       |       |
| Fe1C5   | C                           | 10    | 10.06 | 10.57 | C  | 10.01 | 9.92  | 9.3   | C  | 10.02 | 9.77  | 8.01  |
|         | C                           | 10.02 | 9.62  | 6.73  | C  | 9.99  | 10.21 | 11.85 | Fe | 9.96  | 10.41 | 13.54 |
| Fe1C6   | C                           | 10.06 | 10    | 10.04 | C  | 11.03 | 9.93  | 10.85 | C  | 12.02 | 9.85  | 11.7  |
|         | C                           | 13    | 9.78  | 12.54 | C  | 8.09  | 10.14 | 8.39  | C  | 9.06  | 10.07 | 9.2   |
|         | Fe                          | 6.74  | 10.23 | 7.28  |    |       |       |       |    |       |       |       |
| Fe1C7   | C                           | 10.04 | 11.13 | 11.37 | C  | 10.21 | 9.86  | 11.67 | C  | 10.31 | 8.59  | 11.44 |
|         | C                           | 9.73  | 11.42 | 8.98  | C  | 9.79  | 10.27 | 8.35  | C  | 9.87  | 11.7  | 10.23 |
|         | C                           | 9.89  | 8.98  | 8.23  | Fe | 10.16 | 8.04  | 9.74  |    |       |       |       |
| Fe1C8   | C                           | 10.05 | 11.76 | 9     | C  | 10.21 | 8.2   | 10.13 | C  | 10.4  | 10.72 | 8.26  |

|       |    |       |       |       |    |       |       |       |    |       |       |       |
|-------|----|-------|-------|-------|----|-------|-------|-------|----|-------|-------|-------|
|       | C  | 10.48 | 8.62  | 8.98  | C  | 10.65 | 9.51  | 7.98  | C  | 9.42  | 9.32  | 12.35 |
|       | C  | 9.67  | 12.06 | 10.18 | C  | 9.8   | 8.67  | 11.33 | Fe | 9.33  | 11.14 | 11.79 |
| Fe2C1 | C  | 10.22 | 10.45 | 9.42  | Fe | 8.93  | 11.7  | 9.37  | Fe | 9.94  | 10.57 | 11.1  |
| Fe2C2 | C  | 10.31 | 10.33 | 8.7   | C  | 10.66 | 10.38 | 9.96  | Fe | 10.09 | 9.82  | 11.59 |
|       | Fe | 8.95  | 9.47  | 9.75  |    |       |       |       |    |       |       |       |
| Fe2C3 | C  | 10.17 | 9.25  | 8.44  | C  | 9.82  | 10.92 | 10.74 | C  | 9.94  | 10.05 | 11.71 |
|       | Fe | 10.17 | 8.97  | 10.21 | Fe | 9.89  | 10.81 | 8.9   |    |       |       |       |
| Fe2C4 | C  | 11.22 | 9.46  | 10.31 | C  | 11.78 | 9.93  | 9.24  | C  | 8.22  | 10.07 | 10.76 |
|       | C  | 8.78  | 10.54 | 9.69  | Fe | 10.26 | 10.72 | 8.66  | Fe | 9.74  | 9.28  | 11.34 |
| Fe2C5 | C  | 10.57 | 9.55  | 11.65 | C  | 11.17 | 9.85  | 7.85  | C  | 9.11  | 10.45 | 9.15  |
|       | C  | 9.62  | 9.7   | 12.51 | C  | 9.94  | 10.27 | 8.1   | Fe | 10.87 | 9.95  | 9.79  |
|       | Fe | 8.71  | 10.23 | 10.95 |    |       |       |       |    |       |       |       |
| Fe2C6 | C  | 11.21 | 10.06 | 11.89 | C  | 11.34 | 9.98  | 8.03  | C  | 11.52 | 10.04 | 10.66 |
|       | C  | 11.53 | 10.01 | 9.29  | C  | 7.52  | 9.98  | 10.84 | C  | 8.01  | 9.96  | 9.65  |
|       | Fe | 9.39  | 10.01 | 11.19 | Fe | 9.48  | 9.97  | 8.44  |    |       |       |       |
| Fe2C7 | C  | 11.03 | 9.88  | 8.1   | C  | 11.65 | 9.88  | 9.25  | C  | 12.11 | 9.9   | 10.47 |
|       | C  | 8.01  | 10.07 | 8.84  | C  | 8.19  | 10.1  | 10.1  | C  | 8.74  | 10.11 | 11.3  |
|       | C  | 9.58  | 10.1  | 12.27 | Fe | 11.37 | 9.99  | 12.09 | Fe | 9.32  | 9.96  | 7.6   |
| Fe2C8 | C  | 11.4  | 9.66  | 12.01 | C  | 11.74 | 10.57 | 8.3   | C  | 11.76 | 9.97  | 10.82 |
|       | C  | 11.87 | 10.29 | 9.55  | C  | 8.13  | 9.71  | 10.45 | C  | 8.24  | 10.03 | 9.18  |
|       | C  | 8.26  | 9.43  | 11.7  | C  | 8.6   | 10.34 | 7.99  | Fe | 10.24 | 10.66 | 7.32  |
|       | Fe | 9.76  | 9.34  | 12.68 |    |       |       |       |    |       |       |       |
| Fe3C1 | C  | 11.9  | 10.24 | 10.89 | Fe | 10.07 | 9.9   | 10.77 | Fe | 11.36 | 11.81 | 10.18 |
|       | Fe | 11.6  | 9.7   | 9.13  |    |       |       |       |    |       |       |       |
| Fe3C2 | C  | 9.22  | 10.48 | 9.65  | C  | 9.63  | 10.89 | 10.88 | Fe | 11.29 | 10.46 | 9.96  |
|       | Fe | 9.91  | 9.21  | 8.61  | Fe | 9.94  | 8.97  | 10.9  |    |       |       |       |
| Fe3C3 | C  | 10.02 | 11.55 | 10.49 | C  | 10.93 | 10.56 | 10.56 | C  | 9.79  | 8.69  | 8.7   |
|       | Fe | 10.78 | 8.79  | 10.1  | Fe | 9.06  | 9.97  | 11.17 | Fe | 9.42  | 10.43 | 8.98  |
| Fe3C4 | C  | 10.01 | 8.48  | 10.98 | C  | 10.35 | 11.01 | 8.55  | C  | 10.68 | 9.61  | 11.29 |
|       | C  | 9.11  | 10.68 | 8.98  | Fe | 10.58 | 9.2   | 9.25  | Fe | 10.59 | 11.26 | 10.42 |
|       | Fe | 8.67  | 9.76  | 10.53 |    |       |       |       |    |       |       |       |
| Fe3C5 | C  | 10.95 | 10.15 | 8.43  | C  | 11.72 | 10.14 | 9.55  | C  | 8.53  | 9.84  | 11.18 |
|       | C  | 9.6   | 10.06 | 8.27  | C  | 9.64  | 9.89  | 11.85 | Fe | 10.06 | 9.24  | 9.95  |
|       | Fe | 11.4  | 10.41 | 11.38 | Fe | 8.1   | 10.28 | 9.38  |    |       |       |       |
| Fe3C6 | C  | 10.72 | 8.22  | 9.35  | C  | 10.8  | 11.72 | 9.31  | C  | 11.29 | 9.27  | 8.82  |

|        |    |       |       |       |    |       |       |       |    |       |       |       |
|--------|----|-------|-------|-------|----|-------|-------|-------|----|-------|-------|-------|
|        | C  | 11.32 | 10.63 | 8.8   | C  | 8.54  | 9.39  | 11.28 | C  | 8.58  | 10.71 | 11.27 |
|        | Fe | 9.47  | 7.85  | 10.71 | Fe | 9.57  | 12.19 | 10.66 | Fe | 9.71  | 10    | 9.79  |
| Fe3C7  | C  | 11.15 | 10.36 | 12.16 | C  | 11.45 | 10.04 | 8.43  | C  | 11.65 | 10.31 | 10.95 |
|        | C  | 11.9  | 10.22 | 9.64  | C  | 7.96  | 9.71  | 9.71  | C  | 8.19  | 9.86  | 11.02 |
|        | C  | 8.47  | 9.65  | 8.48  | Fe | 9.38  | 10.14 | 12.36 | Fe | 9.91  | 9.97  | 9.84  |
|        | Fe | 9.94  | 9.74  | 7.41  |    |       |       |       |    |       |       |       |
| Fe3C8  | C  | 10.21 | 11.02 | 11.85 | C  | 10.27 | 7.31  | 10.91 | C  | 10.29 | 8.49  | 11.46 |
|        | C  | 10.29 | 9.73  | 11.97 | C  | 9.71  | 10.27 | 8.03  | C  | 9.71  | 11.51 | 8.54  |
|        | C  | 9.73  | 12.69 | 9.08  | C  | 9.79  | 8.98  | 8.15  | Fe | 10.02 | 7.46  | 9.15  |
|        | Fe | 9.98  | 12.54 | 10.85 | Fe | 10    | 10    | 10    |    |       |       |       |
| Fe3C9  | C  | 10.02 | 11.79 | 8.96  | C  | 10.05 | 10.54 | 8.49  | C  | 10.09 | 9.3   | 8.1   |
|        | C  | 10.11 | 8     | 7.74  | C  | 10.11 | 6.81  | 8.26  | C  | 9.86  | 11.02 | 12.55 |
|        | C  | 9.9   | 9.72  | 12.34 | C  | 9.96  | 12.59 | 9.99  | C  | 9.98  | 8.74  | 11.43 |
|        | Fe | 10.09 | 8.14  | 9.73  | Fe | 9.86  | 12.72 | 11.83 | Fe | 9.97  | 10.62 | 10.59 |
| Fe3C12 | C  | 11.23 | 9.05  | 13.37 | C  | 11.3  | 10.14 | 8.14  | C  | 11.97 | 9.79  | 9.19  |
|        | C  | 12.3  | 8.98  | 12.7  | C  | 12.6  | 9.44  | 10.3  | C  | 12.82 | 9.14  | 11.51 |
|        | C  | 6.91  | 11.3  | 6.6   | C  | 7.92  | 10.39 | 10.12 | C  | 8.17  | 11.11 | 6.34  |
|        | C  | 8.44  | 10.05 | 11.25 | C  | 9.03  | 9.69  | 12.39 | C  | 9.96  | 9.34  | 13.16 |
|        | Fe | 7.67  | 10.81 | 8.3   | Fe | 9.84  | 10.64 | 7.09  | Fe | 9.85  | 10.13 | 9.53  |
| Fe4C1  | C  | 9.76  | 10.71 | 11.67 | Fe | 11.12 | 11.06 | 10.56 | Fe | 8.51  | 11    | 10.42 |
|        | Fe | 9.85  | 9.15  | 10.51 | Fe | 9.92  | 10.61 | 8.68  |    |       |       |       |
| Fe4C2  | C  | 10    | 10.45 | 7.86  | C  | 9.94  | 9.39  | 8.67  | Fe | 10.21 | 11.36 | 11.32 |
|        | Fe | 11.23 | 10.92 | 9.33  | Fe | 8.98  | 11.11 | 9.41  | Fe | 9.99  | 9.26  | 10.51 |
| Fe4C4  | C  | 10.62 | 11.08 | 11.17 | C  | 10.69 | 9.81  | 11.55 | C  | 9.31  | 10.19 | 8.45  |
|        | C  | 9.38  | 8.92  | 8.83  | Fe | 10.1  | 8.23  | 10.53 | Fe | 11.17 | 9.9   | 9.47  |
|        | Fe | 8.83  | 10.1  | 10.53 | Fe | 9.9   | 11.77 | 9.47  |    |       |       |       |
| Fe4C5  | C  | 11.23 | 9.49  | 8.41  | C  | 11.48 | 10.12 | 11.26 | C  | 8.01  | 10.29 | 10.26 |
|        | C  | 8.57  | 10.48 | 11.42 | C  | 9.99  | 9.55  | 8.02  | Fe | 10.15 | 10.51 | 12.34 |
|        | Fe | 12.37 | 9.69  | 9.82  | Fe | 8.2   | 9.86  | 8.46  | Fe | 10    | 10    | 10    |
| Fe4C6  | C  | 11.78 | 11.28 | 9.86  | C  | 11.78 | 10.76 | 11.03 | C  | 8.63  | 9.83  | 8.3   |
|        | C  | 8.64  | 8.61  | 11.02 | C  | 9.58  | 10.63 | 7.94  | C  | 9.59  | 8.89  | 11.85 |
|        | Fe | 11.12 | 11.57 | 8.18  | Fe | 11.13 | 9.71  | 12.38 | Fe | 7.74  | 8.71  | 9.44  |
|        | Fe | 10    | 10    | 10    |    |       |       |       |    |       |       |       |
| Fe4C7  | C  | 10.36 | 7.61  | 12.63 | C  | 11.31 | 10.88 | 11.04 | C  | 11.33 | 11.94 | 10.29 |
|        | C  | 8.69  | 9.34  | 8.61  | C  | 8.98  | 10.4  | 7.86  | C  | 9.47  | 7.51  | 11.69 |
|        | C  | 9.62  | 11.56 | 7.86  | Fe | 10.12 | 10.46 | 9.48  | Fe | 10.59 | 9.24  | 11.7  |
|        | Fe | 10.7  | 12.75 | 8.74  | Fe | 8.84  | 8.31  | 10.11 |    |       |       |       |
| Fe4C8  | C  | 10.13 | 7.41  | 12.9  | C  | 10.32 | 12.45 | 9.89  | C  | 10.33 | 8.66  | 13.11 |

|        |    |       |       |       |    |       |       |       |    |       |       |       |
|--------|----|-------|-------|-------|----|-------|-------|-------|----|-------|-------|-------|
|        | C  | 10.38 | 11.72 | 10.96 | C  | 9.54  | 8.82  | 8.2   | C  | 9.58  | 9.92  | 7.46  |
|        | C  | 9.65  | 8.28  | 9.37  | C  | 9.74  | 11.19 | 7.3   | Fe | 10.09 | 12.77 | 8.12  |
|        | Fe | 10.36 | 10.25 | 12.07 | Fe | 9.92  | 8.1   | 11.18 | Fe | 9.96  | 10.42 | 9.44  |
| Fe4C12 | C  | 10.26 | 9.09  | 12.02 | C  | 10.48 | 10.12 | 7.07  | C  | 10.82 | 8.51  | 11    |
|        | C  | 11.09 | 9.47  | 6.12  | C  | 11.46 | 7.8   | 10.08 | C  | 11.78 | 7.65  | 8.83  |
|        | C  | 8.13  | 12.44 | 11.05 | C  | 8.63  | 12.02 | 9.93  | C  | 8.9   | 10.74 | 13.35 |
|        | C  | 9.35  | 11.19 | 9.15  | C  | 9.65  | 9.73  | 13.01 | C  | 9.84  | 10.8  | 8     |
|        | Fe | 10.61 | 9.34  | 9.12  | Fe | 11.79 | 8.13  | 7.06  | Fe | 7.95  | 12.23 | 12.86 |
|        | Fe | 9.27  | 10.73 | 11.33 |    |       |       |       |    |       |       |       |
| Fe4C16 | C  | 10.05 | 13.22 | 10.06 | C  | 10.09 | 11.4  | 12.97 | C  | 10.19 | 12.3  | 9.12  |
|        | C  | 10.24 | 10.21 | 12.45 | C  | 10.34 | 11.32 | 8.35  | C  | 10.39 | 9.14  | 11.78 |
|        | C  | 10.49 | 10.23 | 7.61  | C  | 10.54 | 8.13  | 10.97 | C  | 10.63 | 9.27  | 6.74  |
|        | C  | 10.69 | 7.1   | 10.21 | C  | 10.82 | 6.45  | 9.06  | C  | 10.89 | 6.44  | 7.76  |
|        | C  | 9.76  | 15.24 | 11.57 | C  | 9.79  | 13.65 | 14.11 | C  | 9.9   | 14.47 | 10.51 |
|        | C  | 9.94  | 12.38 | 13.86 | Fe | 10.63 | 8.4   | 8.57  | Fe | 10.84 | 7.52  | 6.29  |
|        | Fe | 9.65  | 15.35 | 13.39 | Fe | 9.93  | 13.28 | 12.09 |    |       |       |       |
| Fe5C1  | C  | 10.11 | 10.15 | 8.72  | Fe | 10.09 | 8.27  | 9.83  | Fe | 11.44 | 10.09 | 9.91  |
|        | Fe | 8.6   | 9.96  | 9.65  | Fe | 9.86  | 9.8   | 11.65 | Fe | 9.9   | 11.72 | 10.23 |
| Fe5C2  | C  | 10.88 | 9.17  | 8.92  | C  | 9.54  | 9.16  | 8.85  | Fe | 10.08 | 11.51 | 11.07 |
|        | Fe | 10.11 | 9.21  | 10.83 | Fe | 10.2  | 11.11 | 8.8   | Fe | 12    | 10.33 | 10.05 |
|        | Fe | 8.29  | 10.29 | 9.86  |    |       |       |       |    |       |       |       |
| Fe5C3  | C  | 11.2  | 10.66 | 9.03  | C  | 11.36 | 9.45  | 9.56  | C  | 8.65  | 8.77  | 10.28 |
|        | Fe | 10.32 | 8.58  | 10.91 | Fe | 10.85 | 10.82 | 11.09 | Fe | 8.6   | 10.44 | 11.04 |
|        | Fe | 9.43  | 9.54  | 8.82  | Fe | 9.59  | 11.75 | 9.27  |    |       |       |       |
| Fe5C4  | C  | 11.1  | 9.35  | 8.68  | C  | 11.88 | 9.85  | 9.63  | C  | 8.16  | 10.4  | 9.39  |
|        | C  | 8.26  | 11.22 | 10.4  | Fe | 10.15 | 10.99 | 9.65  | Fe | 10.39 | 8.55  | 10.52 |
|        | Fe | 11.61 | 10.29 | 11.48 | Fe | 9.22  | 10.21 | 11.75 | Fe | 9.23  | 9.14  | 8.49  |
| Fe5C5  | C  | 10.65 | 11.45 | 10.98 | C  | 11.89 | 9.05  | 9.8   | C  | 8.27  | 9.13  | 9.63  |
|        | C  | 9.17  | 8.97  | 8.68  | C  | 9.48  | 11.15 | 11.51 | Fe | 10.22 | 9.18  | 10.74 |
|        | Fe | 10.97 | 9.27  | 8.28  | Fe | 11.92 | 10.84 | 9.74  | Fe | 7.98  | 10.06 | 11.24 |
|        | Fe | 9.44  | 10.9  | 9.4   |    |       |       |       |    |       |       |       |
| Fe5C6  | C  | 10.37 | 9.01  | 11.69 | C  | 11.79 | 9.65  | 8.84  | C  | 12.45 | 10.73 | 9.23  |
|        | C  | 7.81  | 10.65 | 9.41  | C  | 8.72  | 11.52 | 9.08  | C  | 9.16  | 8.59  | 11.41 |
|        | Fe | 10.16 | 8.82  | 9.51  | Fe | 10.6  | 11.37 | 8.85  | Fe | 11.81 | 10.04 | 10.94 |
|        | Fe | 7.75  | 8.95  | 10.22 | Fe | 9.39  | 10.66 | 10.83 |    |       |       |       |
| Fe5C7  | C  | 10.54 | 11.04 | 8.2   | C  | 10.65 | 8.76  | 11.36 | C  | 10.68 | 9.89  | 12.04 |
|        | C  | 10.96 | 12.03 | 8.98  | C  | 11.13 | 12.32 | 10.28 | C  | 7.94  | 8.72  | 9.58  |
|        | C  | 8.3   | 7.92  | 8.61  | Fe | 10.64 | 11.72 | 11.94 | Fe | 11.04 | 10.31 | 10    |
|        | Fe | 8.85  | 9.82  | 10.87 | Fe | 9.39  | 9.58  | 8.27  | Fe | 9.88  | 7.89  | 9.87  |

|        |    |       |       |       |    |       |       |       |    |       |       |       |
|--------|----|-------|-------|-------|----|-------|-------|-------|----|-------|-------|-------|
| Fe5C8  | C  | 10.38 | 11.37 | 11.41 | C  | 10.93 | 11.84 | 10.29 | C  | 10.99 | 7.96  | 10.38 |
|        | C  | 11.46 | 11.69 | 9.1   | C  | 11.47 | 8.35  | 9.24  | C  | 7.43  | 9.31  | 9.51  |
|        | C  | 7.99  | 10.26 | 8.82  | C  | 9.96  | 10.47 | 12.25 | Fe | 10.1  | 8.62  | 11.88 |
|        | Fe | 11.69 | 9.97  | 8.35  | Fe | 8.51  | 10.2  | 10.92 | Fe | 9.45  | 8.79  | 9.29  |
|        | Fe | 9.63  | 11.16 | 8.55  |    |       |       |       |    |       |       |       |
| Fe5C10 | C  | 10.55 | 11.75 | 11.62 | C  | 10.64 | 9.93  | 7.4   | C  | 10.66 | 12.19 | 10.39 |
|        | C  | 10.82 | 10.96 | 8.21  | C  | 10.97 | 8.74  | 11.66 | C  | 11.02 | 11.91 | 9.12  |
|        | C  | 11.28 | 8.26  | 10.46 | C  | 7.62  | 9.85  | 10.53 | C  | 7.75  | 9.49  | 9.26  |
|        | C  | 8.26  | 9.9   | 11.71 | Fe | 10.99 | 8.48  | 8.58  | Fe | 11.3  | 10.34 | 10.38 |
|        | Fe | 8.92  | 9.2   | 7.86  | Fe | 9.3   | 8.83  | 10.35 | Fe | 9.91  | 10.17 | 12.47 |
| Fe5C15 | C  | 10.09 | 13.18 | 9.3   | C  | 10.66 | 9.75  | 7.54  | C  | 10.98 | 6.46  | 10.29 |
|        | C  | 12.11 | 7.08  | 10.03 | C  | 12.93 | 7.98  | 9.71  | C  | 13.24 | 9.21  | 9.29  |
|        | C  | 13.42 | 11.69 | 9.22  | C  | 13.77 | 10.44 | 9.45  | C  | 6.61  | 10.05 | 10    |
|        | C  | 6.9   | 8.8   | 10.14 | C  | 7.55  | 7.66  | 10.35 | C  | 8.47  | 6.81  | 10.46 |
|        | C  | 8.85  | 12.89 | 9.47  | C  | 9.39  | 9.56  | 7.53  | C  | 9.73  | 6.43  | 10.44 |
|        | Fe | 11.91 | 12.78 | 9.13  | Fe | 12.19 | 10.47 | 8.26  | Fe | 7.38  | 11.73 | 9.6   |
|        | Fe | 7.75  | 9.72  | 8.39  | Fe | 9.75  | 11.33 | 8.48  |    |       |       |       |
| Fe5C20 | C  | 10.04 | 8.08  | 7.49  | C  | 10.66 | 12.5  | 11.55 | C  | 10.97 | 8.45  | 13.22 |
|        | C  | 11.01 | 7.39  | 8.03  | C  | 11.81 | 10.22 | 10.36 | C  | 11.86 | 7.17  | 9.03  |
|        | C  | 12.03 | 9.23  | 13.39 | C  | 12.39 | 7.55  | 10.18 | C  | 12.85 | 10.19 | 12.98 |
|        | C  | 6.88  | 11.69 | 7.68  | C  | 6.9   | 12.65 | 8.52  | C  | 7.38  | 10.56 | 7.24  |
|        | C  | 7.49  | 13.26 | 9.5   | C  | 8.09  | 9.59  | 6.73  | C  | 8.46  | 13.23 | 10.33 |
|        | C  | 9.05  | 9.41  | 10.36 | C  | 9.06  | 8.71  | 6.89  | C  | 9.14  | 8.76  | 11.51 |
|        | C  | 9.57  | 12.93 | 10.97 | C  | 9.86  | 8.45  | 12.54 | Fe | 10.15 | 11.06 | 10.24 |
|        | Fe | 10.87 | 8.82  | 9.48  | Fe | 12.11 | 11.39 | 11.75 | Fe | 12.5  | 8.92  | 11.42 |
|        | Fe | 8.86  | 9.79  | 8.59  |    |       |       |       |    |       |       |       |
| Fe6C1  | C  | 8.66  | 10.11 | 10.06 | Fe | 10.06 | 9.87  | 11.4  | Fe | 11.34 | 8.68  | 9.78  |
|        | Fe | 11.55 | 11.08 | 10.12 | Fe | 9.06  | 8.35  | 9.99  | Fe | 9.35  | 11.78 | 10.05 |
|        | Fe | 9.97  | 10.12 | 8.6   |    |       |       |       |    |       |       |       |
| Fe6C2  | C  | 9.1   | 9.82  | 7.65  | C  | 9.64  | 10.28 | 11.43 | Fe | 10.38 | 8.98  | 8.64  |
|        | Fe | 10.88 | 10.64 | 10.14 | Fe | 7.86  | 9.47  | 8.94  | Fe | 8.36  | 11.13 | 10.44 |
|        | Fe | 9.24  | 8.71  | 10.61 | Fe | 9.51  | 11.4  | 8.47  |    |       |       |       |
| Fe6C3  | C  | 11.64 | 8.9   | 11.1  | C  | 12.54 | 8.71  | 10.15 | C  | 8.25  | 9.53  | 9.79  |
|        | Fe | 10.91 | 7.77  | 9.5   | Fe | 11.37 | 10.17 | 9.47  | Fe | 8.49  | 7.72  | 9.66  |
|        | Fe | 9.14  | 11.11 | 9.61  | Fe | 9.45  | 9.28  | 8.22  | Fe | 9.73  | 9.26  | 11.05 |
| Fe6C5  | C  | 10.96 | 11.44 | 11.18 | C  | 11.02 | 8.48  | 9.01  | C  | 11.29 | 8.66  | 10.28 |
|        | C  | 8.74  | 11.18 | 9.27  | C  | 9.02  | 10.45 | 8.22  | Fe | 10.03 | 9.04  | 7.54  |
|        | Fe | 10.85 | 10.64 | 9.43  | Fe | 10.97 | 9.77  | 11.76 | Fe | 8.74  | 9.65  | 12.31 |
|        | Fe | 9.19  | 9.16  | 9.95  | Fe | 9.2   | 11.52 | 11.05 |    |       |       |       |
| Fe6C6  | C  | 11.36 | 8.68  | 8.88  | C  | 11.96 | 9     | 10.03 | C  | 8.47  | 9.67  | 11.46 |
|        | C  | 9.3   | 11.89 | 9.27  | C  | 9.3   | 11.12 | 8.18  | C  | 9.59  | 9.65  | 12.18 |

|        |    |       |       |       |    |       |       |       |    |       |       |       |
|--------|----|-------|-------|-------|----|-------|-------|-------|----|-------|-------|-------|
|        | Fe | 10.98 | 10.69 | 9.37  | Fe | 11.46 | 9.8   | 11.73 | Fe | 8.2   | 10.09 | 9.55  |
|        | Fe | 9.65  | 11.42 | 11.15 | Fe | 9.83  | 9.29  | 7.84  | Fe | 9.9   | 8.69  | 10.34 |
| Fe6C7  | C  | 11.05 | 11.32 | 8.41  | C  | 11.87 | 8.53  | 10.95 | C  | 12.19 | 11    | 11.26 |
|        | C  | 12.39 | 9.68  | 11.45 | C  | 8.3   | 10.01 | 10.51 | C  | 8.79  | 8.78  | 10.41 |
|        | C  | 9.92  | 11.99 | 8.66  | Fe | 10.32 | 10.02 | 11.19 | Fe | 10.39 | 7.83  | 10.05 |
|        | Fe | 11.1  | 12.24 | 10.31 | Fe | 11.96 | 10.01 | 9.46  | Fe | 8.76  | 11.8  | 10.14 |
|        | Fe | 9.62  | 9.88  | 8.83  |    |       |       |       |    |       |       |       |
| Fe6C8  | C  | 10.38 | 7.76  | 10.08 | C  | 10.48 | 11.5  | 8.61  | C  | 11.74 | 10.96 | 8.43  |
|        | C  | 12.4  | 9.98  | 9.11  | C  | 7.64  | 10.34 | 10.97 | C  | 8.51  | 11.12 | 11.68 |
|        | C  | 9.14  | 7.93  | 9.64  | C  | 9.86  | 11.35 | 11.6  | Fe | 10.37 | 9.44  | 8.85  |
|        | Fe | 11.27 | 11.13 | 10.43 | Fe | 12.03 | 8.58  | 10.31 | Fe | 7.73  | 9.15  | 9.52  |
|        | Fe | 8.93  | 11.37 | 9.66  | Fe | 9.54  | 9.4   | 11.11 |    |       |       |       |
| Fe6C12 | C  | 10    | 7.6   | 8.77  | C  | 10.19 | 12.41 | 10.5  | C  | 11.25 | 10.17 | 12.18 |
|        | C  | 11.26 | 7.78  | 9.13  | C  | 11.84 | 10.64 | 8.79  | C  | 12.21 | 9.65  | 11.43 |
|        | C  | 7.45  | 9.03  | 10.11 | C  | 7.89  | 9.6   | 11.19 | C  | 8.74  | 9.83  | 12.21 |
|        | C  | 8.94  | 12.27 | 10.15 | C  | 8.97  | 10.27 | 7.98  | C  | 9.95  | 9.99  | 12.49 |
|        | Fe | 10.18 | 11.59 | 8.7   | Fe | 10.6  | 9.36  | 8.13  | Fe | 11.7  | 11.33 | 10.53 |
|        | Fe | 12.39 | 9.13  | 9.69  | Fe | 8.05  | 10.81 | 9.45  | Fe | 8.41  | 8.55  | 8.57  |
| Fe6C18 | C  | 10.22 | 11.86 | 8.82  | C  | 10.57 | 7.38  | 7.71  | C  | 10.75 | 9.58  | 11.52 |
|        | C  | 11.4  | 11.5  | 9.22  | C  | 11.63 | 7.32  | 8.5   | C  | 11.94 | 9.85  | 10.92 |
|        | C  | 12.29 | 10.75 | 9.81  | C  | 12.7  | 7.6   | 9.19  | C  | 6.73  | 10.83 | 9.63  |
|        | C  | 7.1   | 8.35  | 10.9  | C  | 7.66  | 9.68  | 7.14  | C  | 8.18  | 7.63  | 10.56 |
|        | C  | 8.31  | 10.43 | 11.99 | C  | 8.43  | 8.63  | 7.2   | C  | 9     | 12.06 | 8.36  |
|        | C  | 9.46  | 7.38  | 10.66 | C  | 9.49  | 7.84  | 7.27  | C  | 9.58  | 10.21 | 11.78 |
|        | Fe | 11.17 | 7.87  | 10.59 | Fe | 13.28 | 9.15  | 9.95  | Fe | 6.71  | 10.04 | 11.23 |
|        | Fe | 7.39  | 9.07  | 9.08  | Fe | 7.4   | 11.29 | 7.99  | Fe | 8.57  | 11.21 | 10.13 |
| Fe6C24 | C  | 10.06 | 8.98  | 7.22  | C  | 10.3  | 11.01 | 13.47 | C  | 10.54 | 10.01 | 6.53  |
|        | C  | 10.65 | 11.49 | 12.33 | C  | 10.92 | 11.82 | 11.12 | C  | 11.17 | 12.11 | 9.86  |
|        | C  | 12.98 | 11.72 | 4.6   | C  | 13.65 | 12.14 | 6.98  | C  | 13.74 | 12.05 | 5.66  |
|        | C  | 7.69  | 4.96  | 12.81 | C  | 7.71  | 5.33  | 14.03 | C  | 7.88  | 5.03  | 11.53 |
|        | C  | 7.92  | 6.11  | 15.04 | C  | 8.21  | 5.44  | 10.37 | C  | 8.34  | 7.19  | 15.6  |
|        | C  | 8.63  | 6.13  | 9.37  | C  | 8.85  | 8.36  | 15.68 | C  | 9.09  | 6.99  | 8.53  |
|        | C  | 9.39  | 9.45  | 15.25 | C  | 9.52  | 13.63 | 5.47  | C  | 9.54  | 13.68 | 6.8   |
|        | C  | 9.57  | 7.95  | 7.82  | C  | 9.89  | 10.35 | 14.49 | C  | 9.97  | 12.86 | 4.47  |
|        | Fe | 10.04 | 11.85 | 6.18  | Fe | 10.28 | 13.04 | 8.39  | Fe | 10.71 | 10.72 | 8.41  |
|        | Fe | 11.28 | 11.7  | 3.95  | Fe | 12.13 | 11.05 | 6.27  | Fe | 12.55 | 12.19 | 8.49  |
| Fe7C1  | C  | 11.1  | 11.61 | 10.13 | Fe | 10.05 | 9.29  | 8.14  | Fe | 11.27 | 9.8   | 10.03 |
|        | Fe | 8.51  | 9.61  | 9.93  | Fe | 9.62  | 11.38 | 11.19 | Fe | 9.69  | 11.51 | 8.97  |
|        | Fe | 9.84  | 7.72  | 9.86  | Fe | 9.93  | 9.07  | 11.76 |    |       |       |       |
| Fe7C2  | C  | 9.44  | 10.11 | 11.83 | C  | 9.95  | 11.27 | 11.43 | Fe | 10.41 | 11.8  | 9.55  |
|        | Fe | 10.69 | 7.92  | 9.14  | Fe | 11.04 | 9.72  | 10.53 | Fe | 11.7  | 10.18 | 8.37  |
|        | Fe | 8.41  | 10.75 | 10.13 | Fe | 8.96  | 8.55  | 10.66 | Fe | 9.4   | 9.7   | 8.35  |



|        |    |       |       |       |    |       |       |       |    |       |       |       |
|--------|----|-------|-------|-------|----|-------|-------|-------|----|-------|-------|-------|
| Fe7C3  | C  | 11.78 | 9.38  | 9.64  | C  | 11.82 | 10.08 | 10.78 | C  | 9.38  | 10.47 | 8.37  |
|        | Fe | 10.22 | 8.62  | 10.8  | Fe | 10.43 | 11.09 | 9.78  | Fe | 10.54 | 9.04  | 8.32  |
|        | Fe | 10.73 | 10.37 | 12.29 | Fe | 8.07  | 11.43 | 9.24  | Fe | 8.41  | 9.07  | 9.44  |
|        | Fe | 8.61  | 10.45 | 11.35 |    |       |       |       |    |       |       |       |
| Fe7C4  | C  | 10.02 | 8.32  | 11.15 | C  | 10.87 | 9.19  | 11.71 | C  | 10.96 | 10.84 | 8.3   |
|        | C  | 11.56 | 11.24 | 9.45  | Fe | 10.95 | 9.31  | 9.65  | Fe | 11.48 | 10.93 | 11.28 |
|        | Fe | 7.57  | 10.2  | 9.55  | Fe | 8.74  | 8.26  | 9.74  | Fe | 8.99  | 10.11 | 11.39 |
|        | Fe | 9.3   | 9.99  | 7.97  | Fe | 9.56  | 11.61 | 9.8   |    |       |       |       |
| Fe7C5  | C  | 10.7  | 11    | 9.47  | C  | 7.42  | 10.35 | 8.4   | C  | 7.85  | 9.94  | 11.3  |
|        | C  | 8.45  | 10.83 | 7.64  | C  | 9.08  | 10.24 | 11.78 | Fe | 10.26 | 10.84 | 7.74  |
|        | Fe | 10.79 | 10.36 | 11.14 | Fe | 10.99 | 9.02  | 9.15  | Fe | 6.94  | 9.4   | 9.85  |
|        | Fe | 8.78  | 10.91 | 9.77  | Fe | 8.83  | 8.92  | 8.24  | Fe | 9.19  | 8.56  | 10.61 |
| Fe7C6  | C  | 10.3  | 10.34 | 7.36  | C  | 10.46 | 8.72  | 11.94 | C  | 11.38 | 8.54  | 10.98 |
|        | C  | 11.4  | 9.74  | 7.73  | C  | 7.82  | 10.46 | 9.78  | C  | 7.89  | 10.11 | 11.07 |
|        | Fe | 11.03 | 11.3  | 9.04  | Fe | 11.25 | 10.6  | 11.29 | Fe | 11.99 | 8.98  | 9.3   |
|        | Fe | 8.71  | 10.75 | 8.19  | Fe | 9.06  | 9.81  | 12.48 | Fe | 9.31  | 11.65 | 10.63 |
|        | Fe | 9.39  | 9.02  | 10.23 |    |       |       |       |    |       |       |       |
| Fe7C7  | C  | 10.24 | 7.98  | 11.19 | C  | 10.81 | 10.73 | 11.73 | C  | 10.94 | 10.75 | 8.02  |
|        | C  | 11.89 | 10.93 | 8.91  | C  | 7.92  | 10.79 | 10.38 | C  | 7.99  | 11.12 | 9.09  |
|        | C  | 9.24  | 7.94  | 10.33 | Fe | 10.69 | 9.14  | 9.39  | Fe | 11.53 | 9.03  | 11.97 |
|        | Fe | 12.3  | 10.8  | 10.7  | Fe | 8.18  | 9.08  | 9.26  | Fe | 9.12  | 10.63 | 7.67  |
|        | Fe | 9.16  | 9.77  | 11.49 | Fe | 9.99  | 11.31 | 9.88  |    |       |       |       |
| Fe7C8  | C  | 10.15 | 11.12 | 12.19 | C  | 10.16 | 10.57 | 7.09  | C  | 11.7  | 8.59  | 11.08 |
|        | C  | 12.02 | 8.74  | 9.8   | C  | 8.1   | 8.8   | 10.07 | C  | 8.52  | 8.52  | 11.3  |
|        | C  | 9.52  | 11.6  | 7.54  | C  | 9.99  | 12.04 | 11.24 | Fe | 10.03 | 8.19  | 9.92  |
|        | Fe | 10.2  | 9.13  | 12.26 | Fe | 11.19 | 10.54 | 10.43 | Fe | 11.31 | 9.52  | 8.18  |
|        | Fe | 8.58  | 10.56 | 10.96 | Fe | 8.86  | 9.91  | 8.6   | Fe | 9.68  | 12.17 | 9.34  |
| Fe7C14 | C  | 10.43 | 6.78  | 10.02 | C  | 10.68 | 7.46  | 8.91  | C  | 11.08 | 12.39 | 11.67 |
|        | C  | 11.43 | 8.24  | 8.11  | C  | 11.87 | 9.42  | 7.74  | C  | 12.04 | 12.29 | 10.75 |
|        | C  | 12.3  | 12.02 | 9.46  | C  | 8.14  | 9.52  | 9.05  | C  | 8.51  | 11.92 | 10.48 |
|        | C  | 8.96  | 9     | 12.57 | C  | 9.05  | 10.29 | 12.82 | C  | 9.11  | 7.95  | 11.75 |
|        | C  | 9.79  | 6.97  | 11.17 | C  | 9.87  | 11.5  | 8.04  | Fe | 10.31 | 12.31 | 9.78  |
|        | Fe | 11.63 | 11.19 | 8.03  | Fe | 8.28  | 11.28 | 8.83  | Fe | 8.37  | 10.04 | 10.93 |
|        | Fe | 8.82  | 7.97  | 9.69  | Fe | 9.41  | 11.88 | 12.03 | Fe | 9.89  | 9.57  | 8.17  |
|        |    |       |       |       |    |       |       |       |    |       |       |       |
| Fe7C21 | C  | 10.11 | 10.47 | 7.06  | C  | 10.37 | 10.4  | 11.07 | C  | 11.19 | 10.36 | 6.39  |
|        | C  | 11.96 | 8.07  | 11.63 | C  | 12.37 | 10.06 | 5.96  | C  | 13.11 | 7.68  | 11.23 |
|        | C  | 13.56 | 9.6   | 5.86  | C  | 14.14 | 7.45  | 10.48 | C  | 14.58 | 8.95  | 6.31  |
|        | C  | 14.99 | 7.45  | 9.52  | C  | 15.29 | 8.29  | 7.15  | C  | 15.36 | 7.75  | 8.32  |
|        | C  | 6.06  | 8.75  | 12    | C  | 6.12  | 9.51  | 13.08 | C  | 7.21  | 10.3  | 9.61  |
|        | C  | 7.77  | 11.79 | 12.46 | C  | 7.96  | 10.5  | 8.53  | C  | 8.88  | 8.21  | 10.99 |
|        | C  | 8.91  | 9.85  | 14.3  | C  | 9.14  | 10.42 | 7.94  | C  | 9.82  | 9.17  | 13.62 |
|        |    |       |       |       |    |       |       |       |    |       |       |       |

|        |    |       |       |       |    |       |       |       |    |       |       |       |
|--------|----|-------|-------|-------|----|-------|-------|-------|----|-------|-------|-------|
|        | Fe | 10.38 | 8.8   | 11.89 | Fe | 6.76  | 10.67 | 11.45 | Fe | 7.15  | 8.51  | 10.47 |
|        | Fe | 7.3   | 10.76 | 13.87 | Fe | 8.05  | 8.71  | 12.7  | Fe | 9.14  | 9.78  | 9.94  |
|        | Fe | 9.38  | 10.94 | 12.56 |    |       |       |       |    |       |       |       |
| Fe7C28 | C  | 10.35 | 11.37 | 6.23  | C  | 10.37 | 9.49  | 13    | C  | 10.77 | 12.04 | 10.19 |
|        | C  | 10.85 | 10.88 | 9.42  | C  | 11.54 | 10.83 | 6.28  | C  | 11.76 | 9.33  | 12.91 |
|        | C  | 12.82 | 10.57 | 6.39  | C  | 12.85 | 9.43  | 12.25 | C  | 13.89 | 10.25 | 6.99  |
|        | C  | 13.97 | 9.41  | 11.53 | C  | 14.66 | 9.94  | 8.01  | C  | 14.67 | 9.49  | 10.49 |
|        | C  | 14.93 | 9.68  | 9.21  | C  | 5.82  | 10.62 | 8.32  | C  | 6.11  | 9.33  | 8.13  |
|        | C  | 6.41  | 11.76 | 8.61  | C  | 7.1   | 12.61 | 9.38  | C  | 7.59  | 8.62  | 10.83 |
|        | C  | 7.68  | 7.21  | 10.54 | C  | 7.97  | 12.85 | 10.3  | C  | 8.28  | 9.28  | 11.87 |
|        | C  | 8.43  | 6.73  | 11.53 | C  | 8.62  | 10.66 | 12.01 | C  | 8.94  | 8.99  | 8.31  |
|        | C  | 9.18  | 11.53 | 6.91  | C  | 9.32  | 7.11  | 12.39 | C  | 9.35  | 8.48  | 12.58 |
|        | C  | 9.83  | 10.83 | 12.72 | Fe | 10.21 | 10.19 | 7.83  | Fe | 11.2  | 10.51 | 11.34 |
|        | Fe | 7.42  | 8.42  | 9.02  | Fe | 7.76  | 10.52 | 7.76  | Fe | 9.24  | 9.83  | 10.03 |
|        | Fe | 9.28  | 12.25 | 8.86  | Fe | 9.33  | 12.27 | 11.4  |    |       |       |       |
| Fe8C1  | C  | 11.33 | 10.31 | 11.19 | Fe | 10.84 | 8.66  | 11.81 | Fe | 11.13 | 11.46 | 9.7   |
|        | Fe | 11.57 | 9.11  | 9.71  | Fe | 7.71  | 9.86  | 9.35  | Fe | 8.8   | 11.99 | 9.28  |
|        | Fe | 9.38  | 10.35 | 10.9  | Fe | 9.45  | 8.18  | 9.78  | Fe | 9.78  | 10.08 | 8.28  |
| Fe8C2  | C  | 10.4  | 10.54 | 7.98  | C  | 9.33  | 11.17 | 8.46  | Fe | 10.66 | 8.11  | 10.44 |
|        | Fe | 10.79 | 10.68 | 10.09 | Fe | 11.29 | 9.7   | 12.08 | Fe | 11.54 | 9.15  | 8.45  |
|        | Fe | 8.36  | 11.06 | 10.06 | Fe | 8.89  | 9.2   | 11.46 | Fe | 9.19  | 9.08  | 8.89  |
|        | Fe | 9.56  | 11.29 | 12.09 |    |       |       |       |    |       |       |       |
| Fe8C3  | C  | 10.82 | 8.53  | 9.06  | C  | 8.54  | 11.29 | 9.32  | C  | 9.34  | 10.97 | 8.3   |
|        | Fe | 10.57 | 11.62 | 9.9   | Fe | 10.67 | 10.24 | 11.88 | Fe | 10.81 | 9.92  | 7.94  |
|        | Fe | 10.81 | 8.09  | 10.92 | Fe | 12.07 | 9.82  | 9.87  | Fe | 8.54  | 11.21 | 11.21 |
|        | Fe | 8.69  | 8.93  | 11.91 | Fe | 9.14  | 9.36  | 9.68  |    |       |       |       |
| Fe8C4  | C  | 11.07 | 11.53 | 8.48  | C  | 11.68 | 10.32 | 8.45  | C  | 11.68 | 9.15  | 11.15 |
|        | C  | 8.27  | 11.2  | 9.33  | Fe | 10.74 | 9.98  | 12.51 | Fe | 11.29 | 10.96 | 10.46 |
|        | Fe | 11.85 | 8.79  | 9.42  | Fe | 7.68  | 9.55  | 9.92  | Fe | 9.04  | 11.09 | 11.13 |
|        | Fe | 9.6   | 12.37 | 9.15  | Fe | 9.67  | 9.93  | 8.75  | Fe | 9.82  | 8.68  | 10.73 |
| Fe8C5  | C  | 11.95 | 10.97 | 9.31  | C  | 12.17 | 10.61 | 10.56 | C  | 8     | 11.01 | 9.34  |
|        | C  | 8.92  | 11.26 | 8.42  | C  | 9.96  | 7.88  | 9.44  | Fe | 10    | 10.96 | 10.31 |
|        | Fe | 10.68 | 10.8  | 7.93  | Fe | 11.36 | 9.6   | 11.92 | Fe | 11.44 | 8.96  | 9.47  |
|        | Fe | 7.78  | 9.95  | 10.88 | Fe | 8.92  | 9.21  | 8.73  | Fe | 9.3   | 10.43 | 12.55 |
|        | Fe | 9.51  | 8.36  | 11.14 |    |       |       |       |    |       |       |       |
| Fe8C6  | C  | 11.19 | 10.71 | 7.9   | C  | 11.4  | 9.39  | 8.01  | C  | 11.52 | 8.71  | 10.93 |
|        | C  | 8.13  | 9.89  | 11.71 | C  | 8.48  | 11.29 | 9.06  | C  | 9.25  | 10.01 | 12.42 |
|        | Fe | 10.07 | 12.02 | 8.52  | Fe | 11.08 | 9.93  | 12.22 | Fe | 11.35 | 8.04  | 9.24  |
|        | Fe | 11.53 | 10.4  | 9.96  | Fe | 7.53  | 10.02 | 9.97  | Fe | 9.39  | 9.64  | 8.59  |
|        | Fe | 9.52  | 11.29 | 10.76 | Fe | 9.55  | 8.68  | 10.71 |    |       |       |       |
| Fe8C7  | C  | 11.15 | 8.1   | 9.34  | C  | 11.33 | 10.06 | 11.49 | C  | 11.34 | 10.99 | 8.88  |

|        |    |       |       |       |    |       |       |       |    |       |       |       |
|--------|----|-------|-------|-------|----|-------|-------|-------|----|-------|-------|-------|
|        | C  | 8.24  | 11.6  | 10.56 | C  | 8.85  | 9.63  | 8.41  | C  | 8.85  | 8.71  | 10.99 |
|        | C  | 9.41  | 12.24 | 10.79 | Fe | 10.69 | 8.31  | 11.17 | Fe | 10.7  | 9.42  | 8.04  |
|        | Fe | 11.16 | 11.68 | 10.59 | Fe | 12.2  | 9.6   | 9.86  | Fe | 7.88  | 9.9   | 9.96  |
|        | Fe | 9.27  | 7.99  | 9.29  | Fe | 9.46  | 10.4  | 11.68 | Fe | 9.47  | 11.37 | 8.94  |
| Fe8C8  | C  | 11.05 | 8.79  | 11.21 | C  | 11.09 | 11.57 | 10.62 | C  | 11.67 | 8.92  | 8.26  |
|        | C  | 11.69 | 10.23 | 7.98  | C  | 7.82  | 10.34 | 11.45 | C  | 8.83  | 10.5  | 12.31 |
|        | C  | 8.91  | 8.44  | 9.38  | C  | 8.95  | 11.21 | 8.79  | Fe | 10.69 | 10.42 | 12.04 |
|        | Fe | 10.7  | 7.97  | 9.56  | Fe | 10.76 | 11.66 | 8.79  | Fe | 11.95 | 9.97  | 10.02 |
|        | Fe | 7.85  | 9.95  | 9.61  | Fe | 9.15  | 8.76  | 11.24 | Fe | 9.19  | 11.66 | 10.63 |
|        | Fe | 9.72  | 9.61  | 8.11  |    |       |       |       |    |       |       |       |
| Fe9C3  | C  | 10.28 | 12.72 | 9.69  | C  | 11.9  | 9.84  | 8.3   | C  | 12.23 | 10.59 | 9.34  |
|        | Fe | 10.44 | 9     | 7.43  | Fe | 10.56 | 9.48  | 9.91  | Fe | 10.58 | 11.47 | 8.32  |
|        | Fe | 11.48 | 11.76 | 10.57 | Fe | 8.19  | 9.4   | 10.59 | Fe | 8.57  | 10.14 | 8.18  |
|        | Fe | 8.91  | 11.61 | 10.19 | Fe | 9.03  | 7.92  | 8.98  | Fe | 9.93  | 10.53 | 11.93 |
| Fe10C4 | C  | 8.4   | 9.28  | 8.87  | C  | 8.88  | 11.81 | 10.1  | C  | 9.24  | 8.61  | 11.57 |
|        | C  | 9.49  | 9.8   | 12.15 | Fe | 10.17 | 9.44  | 8.11  | Fe | 10.63 | 11.6  | 9.25  |
|        | Fe | 10.98 | 9.45  | 10.72 | Fe | 11.52 | 7.85  | 9.1   | Fe | 12.32 | 11.42 | 10.9  |
|        | Fe | 12.41 | 10.11 | 8.85  | Fe | 8.29  | 10.07 | 10.57 | Fe | 8.47  | 11.12 | 8.42  |
|        | Fe | 9.22  | 7.92  | 9.82  | Fe | 9.99  | 11.52 | 11.57 |    |       |       |       |
| Fe10C5 | C  | 10.14 | 11.94 | 8.93  | C  | 10.36 | 7.72  | 10.79 | C  | 10.4  | 11.17 | 11.72 |
|        | C  | 12.09 | 9.85  | 9.66  | C  | 9.55  | 8.32  | 11.68 | Fe | 10.89 | 10.31 | 8.23  |
|        | Fe | 11.17 | 9.49  | 11.28 | Fe | 11.27 | 8.24  | 9.21  | Fe | 11.43 | 11.53 | 10.18 |
|        | Fe | 7.4   | 10.61 | 10.28 | Fe | 8.67  | 10.99 | 8.29  | Fe | 8.94  | 10.08 | 12.04 |
|        | Fe | 9.06  | 9.02  | 9.75  | Fe | 9.15  | 12.05 | 10.55 | Fe | 9.46  | 8.66  | 7.42  |
| Fe12C3 | C  | 10.21 | 11.8  | 11.19 | C  | 12.05 | 10.15 | 9.71  | C  | 9.14  | 8     | 9.67  |
|        | Fe | 10.2  | 11.13 | 7.11  | Fe | 10.4  | 11.12 | 9.41  | Fe | 10.82 | 8.75  | 10.24 |
|        | Fe | 10.98 | 8.67  | 12.55 | Fe | 11.71 | 10.73 | 11.42 | Fe | 11.75 | 9.58  | 8.01  |
|        | Fe | 8.19  | 9.62  | 10.11 | Fe | 8.25  | 11.26 | 8.32  | Fe | 8.47  | 12.01 | 10.58 |
|        | Fe | 9     | 7.86  | 11.52 | Fe | 9.36  | 10.31 | 12.05 | Fe | 9.48  | 9.01  | 8.13  |
| Fe12C4 | C  | 11.72 | 8.79  | 10.31 | C  | 8.11  | 10.88 | 11.55 | C  | 8.36  | 8.41  | 8.94  |
|        | C  | 9.51  | 7.95  | 8.41  | Fe | 10.44 | 12.24 | 8.4   | Fe | 11.15 | 9.84  | 11.87 |
|        | Fe | 11.32 | 12.22 | 11.17 | Fe | 11.35 | 8.32  | 8.51  | Fe | 11.6  | 10.41 | 7.27  |
|        | Fe | 11.65 | 10.51 | 9.59  | Fe | 7.67  | 9.6   | 10.25 | Fe | 8.94  | 9.38  | 12.41 |
|        | Fe | 9.39  | 11.25 | 10.2  | Fe | 9.47  | 10.02 | 8.16  | Fe | 9.47  | 11.62 | 12.59 |
|        | Fe | 9.84  | 8.55  | 10.35 |    |       |       |       |    |       |       |       |
| Fe12C6 | C  | 10.58 | 11.7  | 7.86  | C  | 10.68 | 8.17  | 11.48 | C  | 12.06 | 9.93  | 9.73  |
|        | C  | 8.38  | 8.83  | 9.16  | C  | 8.59  | 10.77 | 11.69 | C  | 9.77  | 12.41 | 8.64  |
|        | Fe | 10.36 | 11.5  | 12.08 | Fe | 11.34 | 9.98  | 8.03  | Fe | 11.36 | 11.71 | 9.85  |
|        | Fe | 11.55 | 8.08  | 9.75  | Fe | 11.8  | 9.73  | 11.61 | Fe | 7.57  | 9.83  | 10.48 |
|        | Fe | 8.84  | 12.03 | 10.25 | Fe | 8.86  | 10.52 | 8.26  | Fe | 9.14  | 7.63  | 10.46 |
|        | Fe | 9.36  | 9.21  | 12.38 | Fe | 9.86  | 8.15  | 8.14  | Fe | 9.92  | 9.82  | 10.16 |

|        |      |       |       |       |      |       |       |       |      |       |       |       |
|--------|------|-------|-------|-------|------|-------|-------|-------|------|-------|-------|-------|
| Fe14C7 | C    | 10.37 | 12.43 | 9.85  | C    | 10.61 | 7.8   | 8.9   | C    | 11.47 | 8.27  | 11.61 |
|        | C    | 12.66 | 9.89  | 9.41  | C    | 7.37  | 10.87 | 10.22 | C    | 8.63  | 8.76  | 11.84 |
|        | C    | 9.4   | 10.09 | 7.46  | Fe   | 10.26 | 9.29  | 12.57 | Fe   | 10.57 | 11.87 | 11.65 |
|        | Fe   | 11.17 | 9.65  | 8.08  | Fe   | 12.02 | 11.61 | 9.4   | Fe   | 12.02 | 8.28  | 9.88  |
|        | Fe   | 12.19 | 10.12 | 11.37 | Fe   | 7.66  | 9.02  | 10.27 | Fe   | 7.86  | 10.7  | 8.4   |
|        | Fe   | 8.4   | 10.69 | 11.86 | Fe   | 8.52  | 12.35 | 9.99  | Fe   | 9.03  | 8.52  | 8.37  |
|        | Fe   | 9.82  | 7.78  | 10.7  | Fe   | 9.98  | 10.19 | 10.11 | Fe   | 10    | 11.79 | 8.07  |
| Fe15C5 | C    | 10.31 | 9.45  | 12.42 | C    | 12.57 | 10.29 | 10.01 | C    | 7.84  | 10.07 | 10.32 |
|        | C    | 9.93  | 12.5  | 10.82 | C    | 9.96  | 10.93 | 7.7   | Fe   | 10    | 9.11  | 8.01  |
|        | Fe   | 10.16 | 6.86  | 9     | Fe   | 10.19 | 11.35 | 12.32 | Fe   | 10.34 | 7.99  | 11.2  |
|        | Fe   | 11.72 | 10.8  | 8.45  | Fe   | 11.74 | 11.96 | 10.53 | Fe   | 11.87 | 8.58  | 9.46  |
|        | Fe   | 12.01 | 9.85  | 11.73 | Fe   | 8.21  | 11.78 | 10.88 | Fe   | 8.22  | 10.54 | 8.48  |
|        | Fe   | 8.32  | 8.31  | 9.81  | Fe   | 8.39  | 7.65  | 7.61  | Fe   | 8.48  | 9.56  | 12.07 |
|        | Fe   | 9.8   | 12.32 | 8.93  | Fe   | 9.94  | 10.1  | 10.22 |      |       |       |       |
| Fe15C6 | C    | 11.7  | 8.82  | 10.05 | C    | 12.16 | 12.25 | 9.13  | C    | 12.71 | 11.66 | 10.19 |
|        | C    | 8.8   | 11.1  | 8.31  | C    | 8.97  | 8.95  | 12.19 | C    | 9.14  | 11.88 | 11.66 |
|        | Fe   | 10.1  | 10.43 | 12.4  | Fe   | 10.44 | 12.04 | 8.31  | Fe   | 10.51 | 8.16  | 11.37 |
|        | Fe   | 10.79 | 12.16 | 10.74 | Fe   | 10.89 | 7.86  | 8.69  | Fe   | 11.98 | 10.25 | 8.8   |
|        | Fe   | 12.21 | 10.17 | 11.23 | Fe   | 7.56  | 9.84  | 9.06  | Fe   | 7.93  | 10.42 | 11.52 |
|        | Fe   | 8.06  | 8.08  | 10.79 | Fe   | 8.45  | 7.77  | 8.32  | Fe   | 8.51  | 12.11 | 9.87  |
|        | Fe   | 9.55  | 6.46  | 9.97  | Fe   | 9.71  | 9.63  | 7.51  | Fe   | 9.85  | 9.94  | 9.88  |
| Fe16C4 | C    | 10.18 | 12.98 | 9.84  | C    | 10.96 | 8.18  | 11.25 | C    | 11.12 | 11.63 | 12.26 |
|        | C    | 9.57  | 10.19 | 7.65  | Fe   | 10.18 | 13.07 | 11.66 | Fe   | 10.24 | 7.13  | 9.87  |
|        | Fe   | 11.35 | 11.42 | 10.28 | Fe   | 11.44 | 9.8   | 12.05 | Fe   | 11.44 | 9.99  | 7.96  |
|        | Fe   | 11.61 | 7.6   | 8.05  | Fe   | 12.22 | 8.84  | 9.99  | Fe   | 7.45  | 9.86  | 10.92 |
|        | Fe   | 7.9   | 10.26 | 8.57  | Fe   | 8.03  | 7.91  | 9.49  | Fe   | 8.56  | 11.97 | 10.25 |
|        | Fe   | 9.15  | 8.46  | 11.84 | Fe   | 9.31  | 10.88 | 12.19 | Fe   | 9.46  | 8.31  | 7.67  |
|        | Fe   | 9.83  | 9.64  | 9.86  | Fe   | 10    | 11.88 | 8.34  |      |       |       |       |
| Fe18C6 | C    | 10    | 7.26  | 10.45 | C    | 10.02 | 12.42 | 8.71  | C    | 11.97 | 8.09  | 8.43  |
|        | C    | 7.48  | 11.13 | 9.39  | C    | 8.19  | 7.82  | 8.27  | C    | 9.91  | 10.45 | 6.58  |
|        | Fe   | 10.01 | 9.83  | 9.47  | Fe   | 10.1  | 11.18 | 11.8  | Fe   | 10.11 | 7.5   | 8.49  |
|        | Fe   | 11.11 | 11.49 | 7.54  | Fe   | 11.19 | 9.08  | 7.03  | Fe   | 11.46 | 11.95 | 9.91  |
|        | Fe   | 11.69 | 7.91  | 10.24 | Fe   | 12.09 | 9.92  | 11.37 | Fe   | 12.49 | 9.86  | 8.89  |
|        | Fe   | 13.39 | 11.87 | 8.22  | Fe   | 13.67 | 11.45 | 10.45 | Fe   | 7.27  | 9.46  | 8.61  |
|        | Fe   | 7.94  | 9.99  | 10.9  | Fe   | 8.29  | 7.7   | 10.07 | Fe   | 8.72  | 11.25 | 7.86  |
| Fe     | 8.83 | 8.98  | 6.94  | Fe    | 8.84 | 12.14 | 10.08 | Fe    | 9.83 | 8.76  | 11.7  |       |
| Fe20C5 | C    | 10.72 | 10.37 | 13.1  | C    | 11.01 | 7.57  | 10.85 | C    | 12.19 | 11.08 | 10.22 |
|        | C    | 9.21  | 11.02 | 8.01  | C    | 9.46  | 12.8  | 11.18 | Fe   | 10.17 | 10.62 | 10.8  |
|        | Fe   | 10.2  | 12.12 | 12.76 | Fe   | 10.33 | 10.27 | 6.52  | Fe   | 10.62 | 7.08  | 9.07  |
|        | Fe   | 11.13 | 8.66  | 12.34 | Fe   | 11.2  | 11.22 | 8.61  | Fe   | 11.29 | 12.72 | 10.65 |
|        | Fe   | 11.86 | 8.74  | 7.49  | Fe   | 11.91 | 9.1   | 10.05 | Fe   | 12.23 | 10.81 | 12.05 |
|        | Fe   | 7.15  | 9.2   | 11.24 | Fe   | 7.94  | 10.27 | 9.38  | Fe   | 8     | 11.61 | 11.42 |
|        | Fe   | 8.05  | 7.76  | 8.82  | Fe   | 8.19  | 9.43  | 7.05  | Fe   | 8.94  | 9.82  | 12.75 |
| Fe     | 9.21 | 12.42 | 9.33  | Fe    | 9.26 | 8.32  | 10.77 | Fe    | 9.83 | 7.67  | 6.86  |       |

|         |    |       |       |       |    |       |       |       |    |       |       |       |
|---------|----|-------|-------|-------|----|-------|-------|-------|----|-------|-------|-------|
|         | Fe | 9.91  | 9.3   | 8.67  |    |       |       |       |    |       |       |       |
| Fe20C8  | C  | 10.12 | 10.88 | 6.62  | C  | 10.14 | 11.3  | 13.25 | C  | 11.29 | 12.9  | 8.33  |
|         | C  | 11.34 | 8.96  | 11.88 | C  | 11.77 | 12.59 | 11.16 | C  | 7.82  | 11.37 | 8.35  |
|         | C  | 8.56  | 9.56  | 11.51 | C  | 9.02  | 13.14 | 11.27 | Fe | 10.07 | 11.13 | 10.51 |
|         | Fe | 10.41 | 12.79 | 12.34 | Fe | 10.46 | 13.43 | 9.94  | Fe | 10.62 | 9.97  | 8.54  |
|         | Fe | 11.07 | 9.19  | 6.42  | Fe | 11.44 | 7.8   | 8.41  | Fe | 11.74 | 11.6  | 7.13  |
|         | Fe | 11.94 | 10.85 | 12.04 | Fe | 12.2  | 9.19  | 10.29 | Fe | 12.25 | 11.77 | 9.55  |
|         | Fe | 13.03 | 9.84  | 8.13  | Fe | 14.01 | 10.64 | 10.44 | Fe | 7.96  | 12.51 | 9.83  |
|         | Fe | 8.04  | 10    | 9.72  | Fe | 8.38  | 11.42 | 12.05 | Fe | 8.57  | 10.1  | 7.29  |
|         | Fe | 9.03  | 8.06  | 8.33  | Fe | 9.54  | 12.2  | 7.95  | Fe | 9.91  | 9.62  | 12.73 |
|         | Fe | 9.92  | 8.58  | 10.51 |    |       |       |       |    |       |       |       |
| Fe21C7  | C  | 10.95 | 12.72 | 8.84  | C  | 11.14 | 12.08 | 12.36 | C  | 12.46 | 9.75  | 10.24 |
|         | C  | 7.35  | 12.87 | 8.91  | C  | 8.73  | 10.71 | 12.99 | C  | 9.2   | 13.66 | 10.94 |
|         | C  | 9.94  | 8.38  | 10.61 | Fe | 10.55 | 10.51 | 13.14 | Fe | 10.62 | 12.54 | 6.98  |
|         | Fe | 10.98 | 13.02 | 10.71 | Fe | 11.04 | 9.07  | 9.17  | Fe | 11.42 | 8.93  | 11.55 |
|         | Fe | 11.44 | 10.17 | 6.79  | Fe | 12.04 | 11.26 | 9.11  | Fe | 12.49 | 11.16 | 11.47 |
|         | Fe | 7.36  | 10.93 | 11.72 | Fe | 7.42  | 13.1  | 10.76 | Fe | 7.61  | 11.09 | 9.4   |
|         | Fe | 7.61  | 9.91  | 7.23  | Fe | 7.95  | 12.29 | 7.22  | Fe | 8.56  | 8.91  | 9.42  |
|         | Fe | 8.89  | 9.03  | 12.03 | Fe | 9.19  | 13.22 | 9.13  | Fe | 9.27  | 12.48 | 12.41 |
|         | Fe | 9.36  | 10.86 | 5.79  | Fe | 9.62  | 8.63  | 7.23  | Fe | 9.71  | 10.88 | 8.25  |
|         | Fe | 9.82  | 10.81 | 10.68 |    |       |       |       |    |       |       |       |
| Fe25C10 | C  | 10.47 | 7.05  | 11.96 | C  | 10.64 | 10.22 | 6.46  | C  | 11.9  | 12.34 | 10.38 |
|         | C  | 12.7  | 6.9   | 8.94  | C  | 12.95 | 7.73  | 7.92  | C  | 7.42  | 11.4  | 8.7   |
|         | C  | 8.09  | 9.04  | 7.23  | C  | 8.37  | 9.77  | 13.1  | C  | 9.62  | 12.8  | 7.48  |
|         | C  | 9.76  | 6.63  | 9.33  | Fe | 10.09 | 10.26 | 12.51 | Fe | 10.46 | 12.59 | 11.7  |
|         | Fe | 10.46 | 12.76 | 9.23  | Fe | 10.55 | 10.02 | 8.51  | Fe | 10.91 | 7.4   | 8.03  |
|         | Fe | 11.09 | 11.89 | 6.96  | Fe | 11.4  | 6.64  | 10.31 | Fe | 11.45 | 10.6  | 10.72 |
|         | Fe | 11.7  | 8.49  | 11.99 | Fe | 12.28 | 9.29  | 7.08  | Fe | 12.49 | 8.83  | 9.63  |
|         | Fe | 12.57 | 11.44 | 8.83  | Fe | 6.78  | 11.79 | 10.44 | Fe | 7.58  | 9.57  | 8.95  |
|         | Fe | 7.75  | 9.2   | 11.37 | Fe | 8.11  | 11.5  | 12.41 | Fe | 8.15  | 13.03 | 8.54  |
|         | Fe | 8.48  | 7.51  | 8.31  | Fe | 8.51  | 13.55 | 10.8  | Fe | 8.74  | 10.93 | 7.28  |
|         | Fe | 8.85  | 6.62  | 11.01 | Fe | 9     | 11.08 | 10.2  | Fe | 9.26  | 8.08  | 12.95 |
|         | Fe | 9.66  | 8.69  | 6.46  | Fe | 9.79  | 8.58  | 10.3  |    |       |       |       |

**Table S3. The structural parameters of iron carbides crystals.**

| Formula                   | Space group  | Lattice constants |                          | Atom, Site (x, y, z)                          |
|---------------------------|--------------|-------------------|--------------------------|-----------------------------------------------|
|                           |              | Present work      | Referenced data          |                                               |
| $\eta$ -Fe <sub>2</sub> C | Pnnm<br>(58) | a = 4.71 Å        | a = 4.70 Å <sup>26</sup> | C1, 2a (0, 0, 0)<br>Fe1, 4g (0.6667, 0.25, 0) |
|                           |              | b = 4.26 Å        | b = 4.32 Å               |                                               |
|                           |              | c = 2.81 Å        | c = 2.83 Å               |                                               |
|                           |              | α = 90°           | α = 90°                  |                                               |
|                           |              | β = 90°           | β = 90°                  |                                               |
|                           |              | γ = 90°           | γ = 90°                  |                                               |

|                                        |                           |                      |                           |                                 |
|----------------------------------------|---------------------------|----------------------|---------------------------|---------------------------------|
| $\chi$ -Fe <sub>5</sub> C <sub>2</sub> | C <sub>2</sub> /c<br>(15) | a = 11.56 Å          | a = 11.59 Å <sup>27</sup> | C1, 8f (0.107, 0.285, 0.149)    |
|                                        |                           | b = 4.49 Å           | b = 4.58 Å                | Fe1, 8f (0.097, 0.078, 0.423)   |
|                                        |                           | c = 4.98 Å           | c = 5.06 Å                | Fe2, 8f (0.215, 0.581, 0.306)   |
|                                        |                           | $\alpha = 90^\circ$  | $\alpha = 90^\circ$       | Fe3, 4e (0, 0.561, 0.25)        |
|                                        |                           | $\gamma = 90^\circ$  | $\gamma = 90^\circ$       |                                 |
|                                        |                           | $\beta = 97.6^\circ$ | $\beta = 97.8^\circ$      |                                 |
| $\theta$ -Fe <sub>3</sub> C            | Pnma<br>(62)              | a = 5.03 Å           | a = 5.09 Å <sup>28</sup>  | C1, 4c (0.890, 0.250, 0.450)    |
|                                        |                           | b = 6.73 Å           | b = 6.74 Å                | Fe1, 8d (-0.186, 0.563, -0.328) |
|                                        |                           | c = 4.47 Å           | c = 4.53 Å                | Fe2, 4c (0.036, 0.250, 0.852)   |
|                                        |                           | $\alpha = 90^\circ$  | $\alpha = 90^\circ$       |                                 |
|                                        |                           | $\beta = 90^\circ$   | $\beta = 90^\circ$        |                                 |
|                                        |                           | $\gamma = 90^\circ$  | $\gamma = 90^\circ$       |                                 |
| $\gamma$ "-Fe <sub>4</sub> C           | PM-3m<br>(221)            | a = 3.76 Å           |                           | C1, 1b (0.5 0.5 0.5)            |
|                                        |                           | b = 3.76 Å           |                           | Fe1, 1a (0.0 0.0 0.0)           |
|                                        |                           | c = 3.76 Å           |                           | Fe2, 3c (0.5 0.5 0.0)           |
|                                        |                           | $\alpha = 90^\circ$  |                           |                                 |
|                                        |                           | $\beta = 90^\circ$   |                           |                                 |
|                                        |                           | $\gamma = 90^\circ$  |                           |                                 |

---

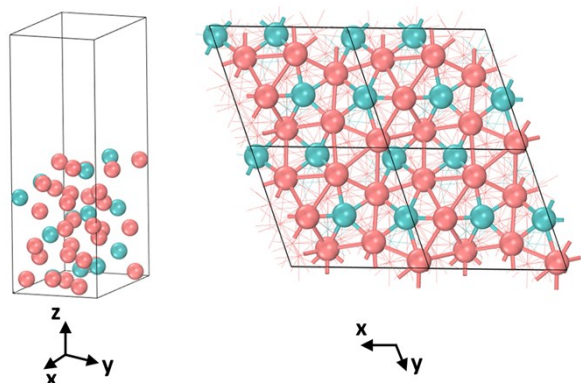

**Figure S1.** The Schematic side and top views of Fe<sub>5</sub>C<sub>2</sub>(111) surface (a = 6.71, b = 6.19, c = 19.19,  $\alpha = \beta = 90^\circ$ ,  $\gamma = 109.552^\circ$ , cell-formula = Fe<sub>30</sub>C<sub>12</sub>)

## Reference

1. Z. X. Cao, *Comp. Theor. Chem.*, 1996, **365**, 211-214.
2. B. K. Nash, B. K. Rao and P. Jena, *J. Chem. Phys.*, 1996, **105**, 11020.
3. R. M. Sosa, P. Gardiol and G. Beltrame, *Int. J. Quantum Chem.*, 1997, **65**, 919-928.
4. A. V. Arbuznikov, M. Hendrickx and L. G. Vanquickenborne, *Chem. Phys. Lett.*, 1999, **310**, 515-522.
5. D. Tzeli and A. Mavridis, *J. Chem. Phys.*, 2002, **116**, 4901.
6. G. L. Gutsev and C. W. Bauschlicher, *Chem. Phys.*, 2003, **291**, 27-40.
7. E. G. Noya, R. C. Longo and L. J. Gallego, *J. Chem. Phys.*, 2003, **119**, 11130.
8. M. F. A. Hendrickx and S. Clima, *Chem. Phys. Lett.*, 2004, **388**, 290-296.
9. M. V. Ryzhkov, A. L. Ivanovskii and B. T. Delley, *Chem. Phys. Lett.*, 2005, **404**, 400-408.
10. V. M. Rayon, P. Redondo, C. Barrientos and A. Largo, *Chem. Eur. J.*, 2006, **12**, 6963-6975.
11. S. Yuan, J. Wang, Y.-B. Duan, Y.-W. Li and H. Jiao, *J. Mol. Catal. A: Chem.*, 2006, **256**, 130-137.
12. H. H. Harris and I. G. Dance, *Polyhedron*, 2007, **26**, 250-265.
13. Q.-M. Ma, Z. Xie, J. Wang, Y. Liu and Y.-C. Li, *Phys. Rev. B*, 2007, **76**, 035412.
14. M. V. Ryzhkov, A. L. Ivanovskii and B. Delley, *Theor. Chem. Acc.*, 2007, **119**, 313-318.
15. M.-Y. Sun, C.-L. Yang, M.-S. Wang, Y.-B. Gong, Y.-T. Zhu and W. Liu, *J. Phys. Chem. A*, 2008, **112**, 4556-4561.
16. Z. X. Zhang, B. B. Cao and H. M. Duan, *Comp. Theor. Chem.*, 2008, **863**, 22-27.
17. L. Largo, C. Barrientos and P. Redondo, *J. Chem. Phys.*, 2009, **130**, 134304.
18. W. Zhu and G. Li, *Int. J. Mass spectrom.*, 2009, **281**, 63-71.
19. M. V. Ryzhkov and B. Delley, *Theor. Chem. Acc.*, 2012, **131**, 1144.
20. G. L. Gutsev, C. A. Weatherford, P. Jena, E. Johnson and B. R. Ramachandran, *J. Phys. Chem. C*, 2012, **116**, 7050-7061.
21. C. Chang, A. B. C. Patzer, W. H. Kegel and S. Chandra, *Astrophys. Space Sci.*, 2013, **347**, 315-325.
22. M. D. Ganji, Z. Sohbatzadeh and A. Khosravi, *Struct. Chem.*, 2013, **25**, 551-559.
23. R. Li, R. Peverati, M. Isegawa and D. G. Truhlar, *J. Phys. Chem. A*, 2013, **117**, 169-173.
24. I. Fishtik, *J. Phys. Chem. A*, 2013, **117**, 4066-4071.
25. Z.-H. Chen and Z. Xie, *Eur. Phys. J. Appl. Phys.*, 2014, **67**, 10403.
26. Y. Hirotsu and S. Nagakura, *Acta Metall.*, 1972, **20**, 645-655.
27. J. J. Retief, *Powder Diffr.*, 1999, **14**, 130-132.
28. E. J. Fasiska and G. A. Jeffrey, *Acta Crystallogr.*, 1965, **19**, 463-471.
